# 1        **Two antagonistic microtubule targeting drugs act synergistically to kill cancer cells**

2    Lauralie Peronne<sup>1</sup>, Eric Denarier<sup>2</sup>, Ankit Rai<sup>3</sup>, Renaud Prudent<sup>1</sup>, Audrey Vernet<sup>1</sup>, Peggy  
3    Suzanne<sup>4</sup>, Sacnicté Ramirez-Rios<sup>1</sup>, Sophie Michallet<sup>1</sup>, Mélanie Guidetti<sup>5</sup>, Julien Vollaire<sup>5</sup>,  
4    Daniel Lucena-Agell<sup>6</sup>, Anne-Sophie Ribba<sup>1</sup>, Véronique Josserand<sup>5</sup>, Jean-Luc Coll<sup>5</sup>, Patrick  
5    Dallemagne<sup>4</sup>, J. Fernando Díaz<sup>6</sup>, María Ángela Oliva<sup>6</sup>, Karin Sadoul<sup>1</sup>, Anna Akhmanova<sup>3</sup>,  
6    Annie Andrieux<sup>2</sup>, and Laurence Lafanechère<sup>1\*</sup>

7

8

9    <sup>1</sup> Institute for Advanced Biosciences, Team Regulation and Pharmacology of the  
10    Cytoskeleton, INSERM U1209, CNRS UMR5309, Université Grenoble Alpes, Grenoble,  
11    France.

12    <sup>2</sup> Grenoble Institute of Neurosciences, INSERM U1216, Université Grenoble Alpes, CEA,  
13    Grenoble, France

14    <sup>3</sup> Cell Biology, Neurobiology and Biophysics, Department of Biology, Faculty of Science,  
15    Utrecht University, Padualaan 8, 3584 CH Utrecht, the Netherlands

16    <sup>4</sup> NORMANDIE UNIV, UNICAEN, CERMN, Caen, France

17    <sup>5</sup> Institute for Advanced Biosciences, Team Cancer targets and experimental therapeutics,  
18    INSERM U1209, CNRS UMR5309, Université Grenoble Alpes, Grenoble, France.

19    <sup>6</sup> Structural and Chemical Biology Department. Centro de Investigaciones Biológicas, CSIC,  
20    Ramiro de Maeztu 9, 28040 Madrid, Spain.

21

22

23    \*Corresponding author: Laurence Lafanechère, Institute for Advanced Biosciences, Site Santé,

24    Bâtiment Albert Bonniot, Allée des Alpes 38700 La Tronche, France. Phone number +33(0)4

25    76 54 95 71 [laurence.lafanechere@univ-grenoble-alpes.fr](mailto:laurence.lafanechere@univ-grenoble-alpes.fr)

26 **Running title:** A new paclitaxel sensitizer that targets tubulin

27 **Keywords:** Cancer therapy, microtubules, drug synergy

28 **Financial support:** This work was supported by Institut National du Cancer INCa,  
29 PLBIO16186) and Association Le Cancer du Sein- Parlons-en, to LL; by Grant Ministerio de  
30 Economía y Competitividad grant BFU2016-75319-R, (AEI/FEDER, UE), European Union  
31 H2020-MSCA-ITN-ETN/0582 ITN TubInTrain to FDP, and Netherlands Organization for  
32 Scientific Research (NWO) CW ECHO grant (711.015.005) to AA.

33

34 **The authors declare no potential conflicts of interest**

35

36 **Word count:**

37 Abstract: 158 words

38 Main manuscript, including acknowledgments: 4667 words

39 Figure legends: 1115 words

40 Number of references: 34

41 Total number of figures: 6

42

43 **Abstract**

44 Paclitaxel is a microtubule stabilizing agent and a successful drug for cancer chemotherapy  
45 inducing, however, adverse effects. To reduce the effective dose of paclitaxel, we searched  
46 for drugs which could potentiate its therapeutic effect. We have screened a chemical library

47 and selected Carba1, a carbazolone, which exerts synergistic cytotoxic effects on tumor cells  
48 grown *in vitro*, when co-administrated with a low dose of paclitaxel. Carba1 targets the  
49 colchicine binding-site of tubulin and is a microtubule-destabilizing agent. The Carba1-  
50 induced modulation of microtubule dynamics increases the accumulation of fluorescent  
51 paclitaxel inside microtubules, providing a mechanistic explanation of the observed synergy  
52 between Carba1 and paclitaxel. The synergistic effect of Carba1 with paclitaxel on tumor cell  
53 viability was also observed *in vivo* in xenografted mice. Thus, a new mechanism favoring  
54 paclitaxel accumulation in microtubules can be transposed to *in vivo* mouse cancer treatments,  
55 paving the way for new therapeutic strategies combining low doses of microtubule targeting  
56 agents with opposite mechanisms of action.

## 57 **Introduction**

58 Microtubules (MTs), dynamic polymeric filaments composed of  $\alpha$ -tubulin and  $\beta$ -tubulin  
59 heterodimers, are key components of the cytoskeleton of eukaryotic cells. Their crucial roles  
60 in cell division and physiology mainly rely on their ability to rapidly polymerize or  
61 depolymerize. Targeted perturbation of this finely tuned process constitutes a major  
62 therapeutic strategy. Drugs interfering with MTs are major constituents of chemotherapies for  
63 the treatment of carcinomas. A number of compounds bind to the tubulin-MT system. They  
64 can be roughly classified into MT-stabilizers such as taxanes or epothilones, and MT-  
65 destabilizers such as vinca alkaloids, combretastatin and colchicine [1]. It has been  
66 demonstrated that binding of vinca alkaloids or colchicine prevents the curved-to-straight  
67 conformational change of tubulin at the tip of the growing MT, necessary for proper  
68 incorporation of new tubulin dimers into the MT lattice (see reviews [1,2]).

69 Paclitaxel (PTX) binds to the taxane-site of  $\beta$ -tubulin and stabilizes the MT lattice by  
70 strengthening lateral and/or longitudinal tubulin contacts within the MT [1]. At stoichiometric  
71 concentrations, it promotes MT assembly. At low and clinically relevant concentrations, PTX

72 primarily suppresses MT dynamics without significantly affecting the MT-polymer mass [3,4].  
73 PTX is one of the most successful chemotherapeutic drugs in history. It is currently used to  
74 treat patients with a variety of cancers including lung, breast and ovarian cancers [5].  
75 Several mechanisms have been proposed to explain the anti-tumor activity of PTX. It can  
76 induce a mitosis dependent cell death, either by producing a mitotic arrest [6], when applied  
77 at high concentrations, or by promoting chromosome mis-segregation at low concentrations  
78 [7]. Alternatively, PTX can act on interphase cells and drive autonomous cell death by  
79 perturbation of intracellular trafficking [8]. It has also been recently proposed that post-  
80 mitotic formation of micronuclei induced by PTX can promote inflammation and subsequent  
81 tumor regression *via* vascular disruption and immune activation [9].  
82 While PTX is a successful anti-cancer drug, its low solubility, its toxicity, and the fact that  
83 cells become resistant to this drug, impose serious limits to its use. Cell resistance to PTX is  
84 due to the high expression of P-glycoprotein or multidrug resistance-associated proteins, as  
85 well as to the overexpression of some  $\beta$ -tubulin isoforms or mutations in  $\beta$ -tubulin that affect  
86 the MT polymer mass and/or drug binding [10]. Another major drawback of PTX in clinical  
87 applications is the development of peripheral neuropathies, primarily involving the sensory  
88 nervous system. Although the molecular bases of these neuropathies are not completely  
89 understood, an inhibition of MT-based axonal transport appears to be a possible mechanism  
90 [11]. It has been recently shown that anterograde kinesin based-axonal transport is  
91 specifically affected by PTX, whereas MT destabilizing drugs that bind preferentially to the  
92 ends of MTs have much less effect on axonal transport [12].  
93 An alternative therapeutic solution would be the use of pharmaceuticals which, when co-  
94 administered with PTX, could potentiate its effect without significantly increasing its toxicity.  
95 Such agents could allow the use of lower doses of PTX in cancer therapy, may limit the  
96 occurrence of resistances and reduce MT-independent adverse effects.



97 To identify such agents, we have screened a collection of 8,000 original compounds using a  
98 cytotoxicity assay and selected a derivative of the carbazolone series (Carba1) able to  
99 sensitize cells to a low, non-toxic dose of PTX. We demonstrated that Carba1 exerts  
100 synergistic cytotoxic effects with PTX. In cells, Carba1 has no major effect on the total MT  
101 mass in interphase cells and shows moderate cytotoxicity. We found that Carba1 targets the  
102 colchicine binding-site of tubulin and inhibits *in vitro* tubulin polymerization. Carba1-induced  
103 modulation of MT dynamics increases the accumulation of fluorescent PTX (Fchitax-3)  
104 inside MTs, providing a structural explanation of the observed synergy between Carba1 and  
105 PTX in cells.

106 Carba1 has no major anti-tumor effect when administrated alone in animals and no detectable  
107 toxicity. The administration of a combination of Carba1 and a low, ineffective, dose of PTX  
108 showed, however, a significant effect on tumor growth, indicating that Carba1 and PTX act  
109 synergistically *in vivo*. Our results pave the way for new therapeutic strategies, based on the  
110 combination of low doses of MT targeting agents with opposite mechanisms of action. These  
111 combinations may have reduced toxicity compared to high therapeutic PTX doses.

112

113

## 114 **Results**

### 115 **A pairwise chemical genetic screen identifies a carbazolone derivative, Carba1, that** 116 **sensitizes cells to paclitaxel**

117 We designed a screen to select compounds that sensitize cells to paclitaxel (PTX). In a first  
118 step, we determined a minimal dose of PTX that is not toxic for cells. We found that 1 nM of  
119 PTX showed no toxicity when applied on HeLa cells for 48 hours (**Supplementary Fig 1**).  
120 Furthermore, such a dose has no detectable impact on MT dynamics as assessed by EB3  
121 tracking after time lapse fluorescence microscopy using GFP-EB3-transfected HeLa cells and

122 subsequent calculation of dynamic instability parameters (**Supplementary Table 1**).

123 We then screened a library of 8,000 compounds at a concentration of 5  $\mu$ M (**Fig 1A and**

124 **Supplementary Table 2**) and compared their cytotoxicity on HeLa cells when administrated

125 alone or in combination with 1 nM PTX. We selected 76 compounds that show no or

126 moderate cytotoxicity when applied alone, and that were found cytotoxic when applied in

127 combination with 1 nM PTX. We decided to focus our study on the 6-chloro-1,4-dimethyl-3-

128 pyrrol-1-yl-9H-carbazole (Carba1, **Fig 1B**) because it did not display reactive chemical

129 groups that could interact not specifically with protein targets and because it showed a

130 synergistic activity with PTX (**Fig 1C**). Indeed, the comparison of HeLa cell apoptosis

131 induced by Carba1 (12  $\mu$ M), PTX (1 nM) to the apoptosis induced by the combination of

132 Carba1 and PTX (12  $\mu$ M/ 1 nM) confirmed the synergistic activity (**Fig 1D**).

133

#### 134 **Carba1 has a moderate cytotoxicity when applied at high concentrations**

135 As our final aim was to test the therapeutic efficacy of Carba1 in combination with PTX, it

136 was important to investigate its cellular effects and to check that this compound is not or

137 moderately toxic by itself. We first analyzed the cytotoxicity of Carba1 on HeLa cells, using

138 the sensitive PrestoBlue assay. As shown in **Fig 2A**, Carba1 has a moderate cytotoxicity with

139 a calculated GI50 of 21.8  $\mu$ M after a 72-hour treatment.

140 Since the Prestoblue assay is a metabolic test that indirectly measures cell viability, we

141 directly detected cells in apoptosis using Annexin V staining, and quantified them by flow

142 cytometry. We compared the effect of two concentrations of Carba1: a concentration (12  $\mu$ M)

143 that has no detectable effect on cell viability and a cytotoxic concentration (25  $\mu$ M). No

144 apoptosis was detected when Carba1 was applied for 72 hours at a concentration of 12  $\mu$ M

145 whereas at 25  $\mu$ M, it induced apoptosis of 30% of the cells (**Fig 2B and 2C**).

146 These results indicate that Carba1 is only weakly toxic, even when applied at a high

147 concentration. A toxicity analysis of a single 10  $\mu$ M dose of Carba1 on a set of 60 human  
148 cancer cell lines (NCI-60 screen [20]) confirmed the low cytotoxic activity of Carba1  
149 **(Supplementary Table 3)**.

150

### 151 **Cell-cycle progression is blocked at mitosis by Carba1**

152 A videomicroscopy analysis, using different doses of Carba1, showed that the compound  
153 impacted mitosis. As compared to DMSO, Carba1 (12  $\mu$ M) induced a significant delay in the  
154 completion of metaphase and a slight increase of aberrant mitosis **(Fig 3A, B,**  
155 **Supplementary Movie 1 and Supplementary Table 4)**. When Carba1 was applied at a  
156 concentration of 25  $\mu$ M, the majority of the cells stayed blocked in prometaphase **(Fig 3A, B**  
157 **and Supplementary Movie 1, right)**. We followed and quantified the fate of the cells treated  
158 with 25  $\mu$ M Carba1 in a 20-hour time lapse video **(Supplementary Movie 2)** and noted that  
159 61% of the mitotic cells eventually died during mitosis, 29% were still dividing abnormally,  
160 whereas only 10% underwent apparently normal mitosis **(Supplementary Table 4)**. We thus  
161 concluded that a cytotoxic dose of Carba1 induced a very long duration of mitotic arrest,  
162 followed by mitotic catastrophe.

163 In accordance with the effect of Carba1 on mitosis, a flow cytometry analysis using  
164 propidium iodide staining indicated that a 15-hour exposure to 25  $\mu$ M Carba1 induced a dose-  
165 dependent cell-cycle arrest at the G2/M phase **(Fig 4A)**. Prolonged exposure (24 and 48  
166 hours) led to a reduction of the number of cells blocked in the G2/M phase and to an increase  
167 of aneuploid cells, as assessed by the increased number of cells in sub G1 and of cells  
168 containing more than 4N DNA **(Fig 4A)**.

169

### 170 **Carba1 increases PTX effects on cell cycle and mitosis**

171 We similarly analyzed the effect of PTX, using time-lapse microscopy. PTX at a  
172 concentration of 1 nM induced a delay in chromosome congression during prometaphase and  
173 a moderate increase of aberrant mitosis (**Supplementary Movie 3, left** and **Supplementary**  
174 **Table 4**). When treated with a cytotoxic concentration of PTX (5 nM) 80% of HeLa cells  
175 underwent aberrant mitosis followed by a mitotic slippage, as shown by a 12-hour time-lapse  
176 video (**Supplementary Movie 3, middle** and **Supplementary Table 4**). We conducted a flow  
177 cytometry analysis to get further insight of the effect of 5 nM PTX on the fate of HeLa cells  
178 treated for longer times (15, 24 or 48 hours). After a 15-hour treatment, half of the cell  
179 population was blocked in the G2/M phase and nearly 20% of the cells were dead, as  
180 indicated by the increased proportion of cells in subG1. Then, the proportion of cells in G2/M  
181 gradually decreased, in parallel with an increased number of cells in subG1 and of  
182 plurinucleated cells (**Fig 4B**). Because the effects of such a cytotoxic concentration of PTX  
183 were different from those of a cytotoxic (25  $\mu$ M) concentration of Carba1, we wondered  
184 which compound effect was predominant in the cytotoxicity of the combination of Carba1  
185 and PTX (12  $\mu$ M/1 nM). We thus compared the effects of this cytotoxic combination to the  
186 effects of Carba1 25  $\mu$ M and PTX 5 nM administrated separately. As shown on **Fig 4C**, the  
187 combination of Carba1 and PTX (12  $\mu$ M/1 nM) induced an arrest of the cell cycle almost  
188 superimposable to the arrest observed when cells are treated with PTX 5 nM. Moreover the  
189 videomicroscopy analysis of the cells treated with this combination showed that cell death  
190 occurred after mitotic slippage (**Supplementary Movie 3, right**). The similarity of the results  
191 obtained with the combination Carba1 and PTX (12  $\mu$ M/1 nM) to those obtained with PTX 5  
192 nM indicates that the overall effect of the combination results from an increase of the PTX  
193 effect induced by Carba1.  
194

195 **Carba1 is a microtubule-destabilizing agent**

196 In an attempt to understand the Carba1 mechanism of action, we first analyzed its effect on  
197 cellular MTs, using immunofluorescence. Carba1 treatment (12-25  $\mu\text{M}$ ) did not visibly  
198 perturb the MT network in interphase cells, as compared to DMSO (control; **Fig 5A**). In  
199 mitosis, chromosome congression defects were visible in several mitotic cells of the 12  $\mu\text{M}$   
200 treated cell population. The occurrence of such defects was increased at a higher dose (25  
201  $\mu\text{M}$ ) of Carba1 (**Fig 5A**). Such defects in chromosome congression are similar to those  
202 observed on cells treated by some inhibitors of kinases involved in the mitotic process such as  
203 Aurora B or Plk1 kinases [21]. Moreover, compounds structurally related to Carba1 often  
204 target protein kinases [22,23]. We therefore tested the ability of Carba1 to inhibit the activity  
205 of a panel of 64 protein kinases including kinases known to be involved in the regulation of  
206 the cytoskeleton and/or the cell cycle. We found that, when *in vitro* assayed at a 10  $\mu\text{M}$   
207 concentration, Carba1 did not show any selective inhibitory activity on the kinases tested  
208 (**Supplementary Table 5**). It is therefore unlikely that Carba1 is a direct inhibitor of these  
209 kinases.

210 The observed effects of Carba1 on the cellular MT network were reminiscent to those  
211 described for low doses of MT depolymerizing agents such as nocodazole or vinca alkaloids:  
212 a mitotic arrest with a similar aberrant chromosome organization, with no detectable effect on  
213 the total MT mass [24]. We thus wondered if Carba1 was, as nocodazole, able to directly  
214 impact MT assembly. The effect of a high dose (25  $\mu\text{M}$ ) of Carba1 on MT dynamic instability  
215 parameters was measured using time-lapse fluorescence microscopy on GFP-EB3 transfected  
216 cells (**Supplementary Table 1**). Carba1 reduced the MT growth rate as well as the MT  
217 growth length, as indicated by the increase of the distance-based catastrophe frequency, and  
218 increased time spent in pause, indicating that Carba1 suppresses MT dynamics.

219 We therefore tested the Carba1 effect on *in vitro* tubulin assembly. As shown in **Fig 5B**,  
220 Carba1 was able to inhibit polymerization of pure tubulin in a dose-dependent manner.  
221 Increasing Carba1 doses induced a decrease in the rate of polymerization, as well as a delay in  
222 nucleation and a reduction in the total quantity of assembled MTs, attested by the scaling  
223 down of the level of assembly at equilibrium (**Fig 5B**). The concentration of Carba1, which  
224 inhibits 50% of tubulin (30  $\mu$ M) assembly under these experimental conditions, was 6.9  $\mu$ M.  
225 To assay the effects of Carba1 on MT dynamics more accurately, we assembled fluorescently  
226 labeled, dynamic MTs *in vitro* and used total internal reflection fluorescence (TIRF)  
227 microscopy to track individual MTs (**Fig 5C**). We found that 4  $\mu$ M Carba1 had no effect on  
228 either MT catastrophe (switch from growth to shrinkage) or rescue (switch from shrinkage to  
229 growth) frequencies, but induced a significant reduction in MT growth rates. Moreover, the  
230 time spent inactive before a new polymerization was largely increased for Carba1 treated  
231 MTs (**Supplementary Table 6**).

232 We then looked for the binding site of Carba1 on tubulin. Among the four binding sites  
233 described for MT depolymerizing agents, the most common binding site is the colchicine site  
234 [1]. We checked whether Carba1 can compete with [ $^3$ H]-colchicine for its tubulin binding-site  
235 (**Fig 5D**). Carba1 selectively inhibited colchicine binding to tubulin, indicating that it binds to  
236 tubulin at or near the colchicine site. However, it did not completely prevent the binding of  
237 [ $^3$ H]-colchicine, suggesting that its affinity for this site is lower than that of colchicine.

238 In order to measure the binding constant of the compounds, a competition assay with 2-  
239 methoxy-5-(2,3,4-trimethoxyphenyl)-2,4,6-cycloheptatrien-1-one (MTC), an analogue of  
240 colchicine lacking the B ring that rapidly reaches an equilibrium ( $K_b = 4.7 \times 10^5 \text{ M}^{-1}$ , 25°C  
241 [25]) in its binding reaction with tubulin, was designed. In the absence of tubulin the  
242 compound lacked fluorescence (**Fig 5E**) while in the presence of tubulin an emission maxima  
243 at 423 nm was observed upon excitation at 350 nm. As expected from its activity as an

244 inhibitor of [<sup>3</sup>H]-colchicine binding to tubulin, Carba1 is able to displace MTC from the  
245 colchicine site, strongly supporting that Carba1 binds to the colchicine site of tubulin. The  
246 dissociation constant of Carba1, for the colchicine site is  $3.03 \pm 0.5 \times 10^{-6}$  mol L<sup>-1</sup> (**Fig 5F**).

247 Altogether, these results show that Carba1 is a direct inhibitor of MT polymerization.

248

249 **Carba1 binding to tubulin enhances the tubulin binding capacity of PTX and its MT**  
250 **stabilizing activity**

251 Carba1 is thus a compound that binds tubulin and impairs MT polymerization. We wondered  
252 how such a mechanism of action could explain the synergy between Carba1 and PTX, a MT  
253 stabilizing compound.

254 Using a fluorescent taxane analog combined with high resolution imaging of MT dynamics, it  
255 has recently been shown by Rai and coll. [26], that low non-saturating concentrations of a MT  
256 depolymerizing agent such as vinblastine, enhance catastrophes and induce a modulation of  
257 MT dynamics that favors an accumulation of PTX inside the MT. Such a mechanism could  
258 explain the observed synergy between Carba1 and PTX. To test if the same molecular  
259 mechanism is at work with Carba1, we first determined the Carba1 concentration able to  
260 induce catastrophes. We found that 10 μM Carba1 was able to induce a two-fold increase of  
261 the catastrophe frequency, which increased further to three-fold when combined with 100 nM  
262 PTX (**Fig 5G, Supplementary Fig 2A, B, C**). Further, Carba1 also increased the  
263 incorporation of a fluorescent derivative of PTX (Fchitax-3) within the MT shaft (**Fig 5H, I**).

264 Such a result strongly suggests that the underlying mechanism for the observed synergy is that  
265 Carba1 binding to MTs induces a modification of the MT lattice leading to enhanced  
266 accumulation of PTX.

267

268 **Carba1 and PTX act synergistically to reduce tumor growth *in vivo***

269 Could the synergy between Carba1 and PTX, which we observed both at the molecular and  
270 the cellular levels, be translated into a therapeutic anti-cancer effect? To address this question,  
271 we compared the effects on tumor growth of Carba1 and PTX administrated separately to the  
272 effect of administration of Carba1 in combination with PTX, in a tumor mouse model. In a  
273 first series of experiments, we analyzed the effect of increasing doses of PTX or Carba1 when  
274 administered alone. To that aim, mice bearing sizable tumors, formed of HeLa cells that have  
275 been xenografted, received intravenous (i.v.) injections of PTX (from 2 to 8 mg/kg), every  
276 two days during 10 days (**Fig 6A**). In the same experiment, we analyzed the effect of Carba1  
277 (from 15 to 60 mg/kg, i.v.) injected with the same schedule (**Fig 6B**). We found that PTX,  
278 when administered at 4 and 8 mg/kg, induced an important reduction of tumor size (**Fig 6A**).  
279 Carba1 did not induce a significant effect on tumor size whatever the dose injected, although  
280 a tendency towards smaller tumors appears with increasing Carba1 concentrations (**Fig 6B**).  
281 The results confirmed the anti-tumor effect of high PTX concentrations in this model. They  
282 also indicate that Carba1, when applied alone, has no significant anti-tumor activity, even at  
283 high concentrations. As shown in **supplementary Fig 3** the weight of PTX or Carba1 treated  
284 animals and vehicle-treated animals were not significantly different. Moreover the animals  
285 did not show any sign of discomfort, indicating a good tolerance of the treatments.  
286 We then conducted a study of the effect on tumor size of a low PTX dose (3 mg/kg) in  
287 combination with Carba1 (60 mg/kg). No modification of body weight was observed  
288 throughout the study, suggesting that the combination is well tolerated (**Supplementary Fig**  
289 **4**). In this experiment PTX (3 mg/kg) has no effect on tumor size (**Fig 6C**). Compared to the  
290 previous experiment (no effect at 2 mg/kg, significant effect at 4 mg/kg), an intermediate  
291 effect would have been expected at 3 mg/kg. This indicates that the effect of PTX on tumors  
292 in this *in vivo* model should be observed at a threshold dose between 3 and 4 mg/kg.



293 As shown in **Fig 6C**, while no effect is observed when each compound is administered  
294 separately, a significant reduction in tumor size is observed with the combination of PTX and  
295 Carba1. These results indicate that the observed synergy between PTX and Carba1 *in vitro*  
296 also occurs *in vivo*, leading to an enhanced therapeutic efficacy at a low-dose of PTX  
297 treatments.

298

## 299 **Discussion**

300 Our initial aim was to discover an agent that would allow lowering the dose of PTX while  
301 obtaining the same anti-tumor efficacy as the currently used therapeutic dose of PTX resulting  
302 in less toxicity. We thus screened a chemical library to detect compounds able to sensitize  
303 cells to a low, non-toxic dose of PTX. The test we used was a cytotoxicity test, therefore  
304 probing all vital cell functions. Whereas such a whole cell-based assay screens molecules  
305 having multiple potential targets and allows the biology to dictate the best targets [27], it may  
306 not be insignificant to have selected Carba1, an agent that targets tubulin and impairs MT  
307 dynamics. Indeed, this indicates that the most sensible target, in this specific context, is  
308 tubulin.

309 Recently, a series of carbazole-based MT targeting agents with anti-tumor properties has been  
310 reported, confirming the ability of this type of chemical scaffold to interact with the  
311 colchicine site of tubulin [28]. The Carba1 scaffold is a versatile one and we are currently  
312 synthesizing modified analogs for medicinal chemistry optimization.

313 The PTX binding site at the interior of the MT has been characterized at the atomic level:  
314 PTX binds to a pocket in  $\beta$ -tubulin that faces the MT lumen and is near the lateral interface  
315 between protofilaments (for review see [1]). The binding of PTX results in the expansion of  
316 the taxane binding pocket [29] of the tubulin dimer. Moreover PTX binding inhibits, in the  
317 protofilament, the compaction at the longitudinal interdimer interface, induced by GTP

318 hydrolysis [30]. This allosteric mechanism would strengthen the longitudinal tubulin contacts  
319 leading to a stabilization of the MTs [1]. In this context, it is conceptually counterintuitive  
320 that an agent that depolymerizes MTs acts in synergy with PTX, an agent that stabilizes them.  
321 A possibility is that the binding of Carba1 to the tubulin dimer modifies its affinity for PTX.  
322 However, although it has been shown that the covalent occupancy of the taxane site can affect  
323 the structure of the colchicine site [31], the reverse has not yet been described. Moreover, in  
324 cells, due to the low affinity of Carba1 for tubulin and the nanomolar concentration of PTX  
325 that was used, it can be assumed that the probability that a single tubulin dimer has both a  
326 molecule of Carba1 and another of PTX bound is very low. Thus an allosteric effect at the  
327 level of the tubulin dimer, due to such a simultaneous binding, cannot be responsible for  
328 synergistic cytotoxicity.

329 Another possibility is that the binding of Carba1 can induce conformational changes of the  
330 growing MT ends that can facilitate the subsequent binding of PTX to the MT lattice.  
331 Recently, using TIRF analysis, it has been shown that inhibition of polymerization due to  
332 non-saturating doses of vinblastine induces a switch to catastrophes, which converts the MT  
333 plus end to a state that allows more accumulation of fluorescent PTX, indicating a higher  
334 affinity of MT growing ends for PTX [26]. Indeed, we have conducted the same type of  
335 experiment, replacing vinblastine with Carba1 and observed an increase in the rate of  
336 catastrophes associated with a greater incorporation of fluorescent PTX. Although the  
337 underlying structural mechanism is yet unknown, it is highly probable that Carba1 acts  
338 similarly to vinblastine to facilitate PTX accumulation.

339 It is known that PTX accumulates intracellularly [4], reaching intra-tumor concentrations that  
340 are higher in the tumors than in the plasma [7]. It is thus remarkable that the synergistic effect  
341 is observed not only at the MT level, but also at the cellular level, as well as when both drugs  
342 are applied systemically in animals to exert their anti-tumor action. Although it cannot be

343 excluded that Carba1 has other targets, it is highly probable that the same mechanism is at  
344 work in these different contexts.

345 Because the combined administration of Carba1 and a low dose of PTX can have an anti-  
346 tumor effect equivalent to the administration of high doses of PTX alone, one could imagine  
347 that the combination should reduce the unwanted side effects of PTX. This has to be tested.  
348 For instance the effect of the combination should be compared to the PTX effect on the  
349 kinesin-based anterograde transport, since perturbation upon PTX treatment is thought to be  
350 part of the mechanism involved in peripheral neuropathy. But, given the mode of action we  
351 have described, with Carba1 facilitating the accumulation of PTX in MTs, we can bet that the  
352 combination should diminish MT-independent adverse events.

353 Anti-cancer strategies based on the concomitant administration of taxanes and depolymerizing  
354 agents such as vinorelbine have been reported [32–34]. However, these approaches used high  
355 doses of each of these drugs. Our results suggest that good therapeutic efficacy could be  
356 achieved with the combined administration of each of these agents at low doses, which could  
357 improve patient comfort. This work thus paves the way to new therapeutic perspectives that  
358 are easy to implement.

359

360

361 **Materials and methods**

362 *Chemical Reagents and cells*

363 Carbal was synthesized at the CERMN (Centre d'Études et de Recherche sur le Médicament  
364 de Normandie, University of Caen). It was dissolved in anhydrous dimethyl sulfoxide (DMSO,  
365 Sigma, #D4540) and stored at -20°C as 10 mM stock solution. Paclitaxel (PTX) was  
366 purchased from Sigma (#T7402) and was dissolved in DMSO and stored at -20°C as 1 mM  
367 stock solution.

368 HeLa cells were obtained from the American Type Culture Collection (ATCC), routinely  
369 tested and authenticated by the ATCC. HeLa Kyoto cells expressing EGFP-alpha-tubulin and  
370 H2B-mcherry were from Cell Lines Service, #300670. Cells were grown in RPMI 1640  
371 medium (Gibco, Invitrogen) supplemented with 1% penicillin/streptomycin and 10% Fetal  
372 Bovine Serum, and maintained in a humid incubator at 37°C in 5% CO<sub>2</sub>.

373 *Analysis of cell viability using MTT (screening of the chemical library)*

374 The assay was performed in 96-well microplates. Cells were seeded at a density of 2,500 cells  
375 per well and allowed to adhere for 24 hours before being treated for 48 hours with either  
376 DMSO (0.1 % final concentration) or compounds at 5 µM, with or without 1 nM PTX.  
377 Viability was evaluated with a 3-(4,5-dimethylthiazol-2-yl)-2,5-diphenyl-tetrazolium bromide  
378 (MTT) colorimetric assay (Sigma, #M5655).

379 *Analysis of cell viability using Prestoblue assay*

380 Cell viability was analyzed using the colorimetric Prestoblue assay (Invitrogen, #A13262).  
381 Cells were seeded in 96-well microplates (Greiner, #655077) at a density of 2,500 cells per  
382 well and allowed to adhere for 24 hours before being treated for 72 hours with either DMSO  
383 (0.1 % final concentration) or drugs at indicated concentrations. After a 72-hour treatment, 11  
384 µL Prestoblue was added to each well and cells were incubated for another 45 minutes. The

385 absorbance of each well was measured using a FLUOstar Optima microplate reader  
386 (Excitation, 544 nm; Emission, 580 nm).

### 387 *Apoptosis assay*

388 The apoptosis assay was performed with FITC Annexin V Apoptosis Detection Kit I (BD  
389 Biosciences, #556547) using flow cytometry and analyzed by FCS express software.

### 390 *Cell cycle analysis*

391 Cells were harvested and washed by centrifugation in PBS. Then,  $10^5$  cells were fixed in 1  
392 mL of 70% ethanol at 4°C overnight. Following two washes with PBS the cells were  
393 incubated with 50 µg/mL propidium iodide and 0.2 mg/mL RNase A (Sigma, #10109142001)  
394 / PBS for 30 minutes at 37°C before analysis. The percentage of cells in the specific cell-cycle  
395 phases (G0, G1, S, G2, and M) was determined using an Accuri C6 flow cytometer (Becton  
396 Dickinson).

### 397 *Immunofluorescence microscopy and live cell imaging*

398 HeLa cells at a density of 20,000 cells were grown for 48 hours on glass coverslips placed in  
399 a 24-well microplate. When cells reached 70% confluence the medium was replaced with a  
400 fresh one supplemented with Carba1. After a 5-hour exposure to Carba1, cells were fixed and  
401 permeabilized with -20°C absolute methanol for 6 minutes. After washing and saturation with  
402 3% BSA (Bovine Serum Albumin; Sigma, #A7906) / PBS (Phosphate Buffered Saline;  
403 Dutscher, #L0615-500), cells were incubated for 45 minutes at room temperature (RT) with  
404 anti-alpha-tubulin antibody (clone  $\alpha$ 3A1, 1:4000), produced by L. Lafanechère [13]. Cells  
405 were washed twice again and subsequently incubated with Alexa 488 conjugated anti-mouse  
406 antibody (1:1000, Jackson immunoresearch, #115-545-4637) for 30 minutes at RT. DNA was  
407 stained with 20 µM Hoechst 33342 (Sigma, #23491-52-3) and coverslips were mounted on  
408 glass slides with Mowiol 4-88 (Calbiochem, #475904). Images were captured with a Zeiss  
409 AxioimagerM2 microscope equipped with the acquisition software AxioVision and analyzed

410 using the Fiji software. For live-cell imaging, HeLa Kyoto cells expressing EGFP-alpha-  
411 tubulin and H2B-mcherry were seeded on 2-well glass-slides (Ibidi, #80297) at a density of  
412 7,000 cells per well and allowed to grow for 24 hours prior to imaging. After treatment, the  
413 slide was placed on a 37°C heated stage, at 5% CO<sub>2</sub>, and images were acquired every 2.5  
414 minutes by a spinning disk confocal laser microscope (Andromeda iMIC) equipped with a  
415 Plan-Apochromat 20×/0.75 WD610 objective and an EMCCD camera (iXon 897). For each  
416 time point, a stack of 7 planes (thickness: 1 μm) was recorded. Acquisition (LA), off-line  
417 analysis (OA) and Fiji software programs were used.

#### 418 *Transfection of GFP-EB3*

419 To label MT plus ends, GFP-EB3 plasmids were used because EB3 has a strong binding  
420 affinity to MT plus ends. Cell transfection was performed using electroporation (AMAXA®,  
421 Köln, Germany). 2 μg of purified plasmid DNA were used for each transfection reaction.

#### 422 *Fluorescence time-lapse videomicroscopy of MT plus ends*

423 Live imaging of MT plus ends was performed as described in Honoré et al. [14] , on  
424 transiently GFP-EB3 transfected-HeLa cells by using an inverted fluorescence microscope  
425 (ZEISS Axiovert 200M with a 63X objective). Time-lapse acquisition was performed with a  
426 COOLSNAP HQ (Roper Scientific), driven by Metamorph software (Universal Imaging  
427 Corp.). Image acquisition was performed at a temperature of 37 ± 1°C / 5% CO<sub>2</sub>

428 Data are from 3 independent experiments. For each experiment, 6 MTs/cell in 6 cells per  
429 condition were analyzed.

#### 430 *Dynamic instability parameter analysis*

431 The dynamic instability parameter analysis was performed by tracking MT plus ends over  
432 time using the imageJ software. The methods of calculation were as described in Honoré et al.  
433 [14].

#### 434 *Tubulin Polymerization Assay*

435 Tubulin was prepared from bovine brain as previously described [15]. Tubulin polymerization  
436 assays were carried out at 37°C in BRB80 buffer (80 mM Pipes, 0.5 mM MgCl<sub>2</sub>, 2 mM  
437 EGTA, 0.1 mM EDTA, pH 6.8 with KOH) by mixing 7 μM of pure tubulin, 1 mM GTP, 5  
438 mM MgCl<sub>2</sub>, and indicated concentrations of drugs (0.2% DMSO, final concentration) in a  
439 final volume of 100 μL. The time course of the self-assembly activity of tubulin was  
440 monitored as turbidity at 350 nm, 37°C, during 30 minutes, using a spectrophotometer  
441 (ThermoScientific, Evolution 201).

#### 442 *[<sup>3</sup>H]-Colchicine Tubulin-Binding Assay*

443 The tubulin was prepared from bovine brain as previously described [15]. Pure tubulin (3 μM  
444 final concentration) in cold BRB80 buffer was mixed at 4°C with [<sup>3</sup>H]-colchicine (82.6  
445 Ci/mmol, Perkin-Elmer, #NET189250UC, 50 nM final concentration) and the competitor  
446 Carba1 (100 μM final concentration) in a final volume of 200 μL. Following a 30-minute  
447 incubation at 30°C, the samples were deposited onto 50 μL of presedimented DEAE  
448 Sephadex A25 in BRB80 buffer. All subsequent steps were carried out at 4°C. Samples were  
449 incubated for 10 minutes with continuous shaking to ensure quantitative binding of tubulin to  
450 the gel. Following centrifugation (2400g, 4 minutes), supernatants were discarded and the  
451 pellets containing the bound molecule-tubulin complexes were washed four times with 1 mL  
452 of BRB80 buffer. Pellets were incubated for 10 minutes with 500 μL of ethanol to solubilize  
453 the tubulin-bound tritiated colchicine and 400 μL aliquots of the ethanol solutions were  
454 transferred to 5 mL of Ultima Gold scintillant (Perkin-Elmer) for determination of  
455 radioactivity.

#### 456 *Determination of the binding constant of Carba1 on tubulin using a competition assay*

457 Calf brain tubulin was purified as described [16]. 2-Methoxy-5-(2,3,4-trimethoxyphenyl)-  
458 2,4,6-cycloheptatrien-1-one (MTC)[17] was a kind gift of Prof. T. J. Fitzgerald (School of  
459 Pharmacy, Florida A & M University, Tallahassee, FL). The compounds were diluted in

460 99.8% DMSO-d<sub>6</sub> (Merck, Darmstadt, Germany) to a final concentration of 10 mM and stored  
461 at -80°C.

462 Competition of the compound with MTC was tested by the change in the intensity of  
463 fluorescence of MTC upon binding to tubulin. The fluorescence emission spectra (excitation  
464 at 350 nm) of 10 μM tubulin and 10 μM MTC in 10 mM sodium phosphate, 0.1 mM GTP, pH  
465 7.0, were measured in the presence of different concentrations (0 to 20 μM) of the desired  
466 ligand with 5 nm excitation and emission slits using a Jobin-Yvon SPEX Fluoromax-2  
467 (HORIBA, Ltd., Kyoto, Japan). The decrease in the intensity of the fluorescence in the  
468 presence of the competitor ligand indicated competition for the same binding site. The data  
469 were analyzed and the binding constants determined using Equigra V5.0 as described in Díaz  
470 and Buey [18].

#### 471 *In vitro MT dynamics and analysis of MT dynamics parameters*

472 Perfusion chambers were obtained by assembling silane-PEG-biotin (LaysanBio, #MW3400)  
473 coverslips and silane-PEG (Creative PEGWork, #PSB-2014) glass slides as described  
474 previously [15]. The chambers were perfused with Neutravidin (25 μg/mL in 1% BSA,  
475 ThermoFisher Scientific, #31000), PLL-PEG (0.1 mg/mL in 10 mM HEPES, pH 7.4,  
476 Jenkem, #PLL20K-G35-PEG2K), 1% BSA in BRB80, and GMPCPP-stabilized (Jena  
477 Bioscience, #NU-405S), ATTO-488-labeled MT seeds (ATTO-Tec). MT assembly was  
478 initiated with 12 μM tubulin (containing 20% ATTO 488-labeled tubulin) in the presence of 4  
479 μM Carba1. Time-lapse imaging was performed on an inverted Eclipse Ti (Nikon)  
480 microscope with an Apochromat 60×/1.49 numerical aperture (NA) oil immersion objective  
481 (Nikon) equipped with an ilas2 TIRF system (Roper Scientific). We performed time-lapse  
482 imaging at 1 frame per 2 seconds with an 80 milliseconds exposure time. MT dynamics  
483 parameters were determined on kymographs using ImageJ software. *In vitro* assay for MT  
484 growth dynamics and analysis of MT dynamic parameters in the presence of tubulin



485 (cytoskeleton) and EB3 with Carba1 and Fchitax-3 was performed as described previously  
486 [26]. For statistical analysis, graphs were plotted in GraphPad Prism 7 and statistical analysis  
487 was done using non-parametric Mann-Whitney U-test.

#### 488 *Tumor xenografts in mice*

489 All animal studies were performed in accordance with the institutional guidelines of the  
490 European Community (EU Directive 2010/63/EU) for the use of experimental animals and  
491 were authorized by the French Ministry of Higher Education and Research under the  
492 reference: apafis#8854-2017031314338357 v1.

493 In a first series of experiment, the effects of PTX or Carba1 when administrated alone were  
494 evaluated. To that aim anesthetized (4% isoflurane/air for anesthesia induction and 1.5%  
495 thereafter) five-week-old female NMRI nude mice (Janvier Labs, Le Genest-Saint Isle,  
496 France) were injected subcutaneously in the flank with  $10^7$  exponentially dividing Hela cells  
497 in 1X PBS. Tumor size was measured three times a week using a caliper, and the tumor  
498 volume was calculated as follows: length x (width)<sup>2</sup> x 0.4. When tumors have reached a  
499 volume of about 200 mm<sup>3</sup> i.e. nine days after cell injection, mice were randomized in 7  
500 groups of 6 mice each and drugs were injected intravenously every two days. A first group  
501 received the vehicle (14% DMSO, 14% Tween 80 and 72% PBS). Three groups received  
502 PTX at different doses (2, 4 and 8 mg/kg) while three other groups received Carba1 at  
503 different doses (15, 30 and 60 mg/kg).

504 In a second series of experiments, the effect of a combination of PTX- Carba1 was evaluated,  
505 and compared to the effect of the compounds alone. To that aim, five-week-old female NMRI  
506 nude mice were injected subcutaneously with  $10^7$  exponentially dividing HeLa cells into the  
507 right flank. When tumors have reached a volume of about 200 mm<sup>3</sup> i.e. nine days after cell  
508 injection, mice were randomized in 4 groups of 8 mice each and drugs were injected  
509 intravenously every two days. The first group received PTX at 3 mg/kg, the second group

510 Carba1 at 60 mg/kg, the third group received a combination of Carba1 (60 mg/kg) and PTX  
511 (3 mg/kg), and the fourth group received the vehicle (14% DMSO, 14% Tween 80 and 72%  
512 PBS). Groups were statistically compared using ANOVA.

513

#### 514 **Acknowledgments**

515 This work was supported by INSERM, Université Grenoble Alpes, CNRS, and by l'Institut  
516 National du Cancer (INCa, PLBIO16186), Fondation ARC (PJA 20151203348) and  
517 Association "Le Cancer du Sein, Parlons-en!", to LL. We thank Isabelle Arnal and Christian  
518 Delphin for their help in the purification of tubulin and in the TIRF experiments, Ganadería  
519 Fernando Díaz for calf brain supply, Wei-Shuo Fang for synthesizing Fchtitax-3 and Anne  
520 Martinez for her help in the initial step of the study. We also thank the Developmental  
521 therapeutics program at the National Cancer Institute for the screening of Carba1 on 60 cancer  
522 cell lines.

523 **Author contributions:** L.L. conceived the project and supervised the findings of this work.  
524 L.P. designed and realized in cellulo and in vitro experiments under the supervision of L.L.,  
525 E.D. and A. And. A. And. and E.D. advised on the mechanism of action. R.P. conceived and  
526 designed the screening and A.V. performed the screening and its analysis. A.R. performed  
527 Fichtax-3 experiments and analysis and contributed to Fig. 5. S.R.R. realized tubulin  
528 purification and contributed to the experiments measuring microtubule dynamics. S.M. and  
529 A.S.R. performed additional cell cytotoxicity experiments. D.L.A., M.A.O. and J.F.D.  
530 performed the analyses of the affinity of Carba1 for tubulin and contributed to Fig. 6. M.G.  
531 and J.V. realized the animal experiments, their statistical analysis and contributed to Fig. 6.  
532 V.J. and J.L.C conceived the animal experiments and interpreted the data.  
533 P.S. and P.D. synthesized and provided the chemical compounds.  
534 A. Akh., J.F.D, E.D., A. And. and K.S. contributed to the interpretation of the results.

535 L.L., L.P. and K.S. wrote the manuscript and designed the figures with input of all the authors.

536

537 **Conflict of interest:** The authors declare no potential competing interest.

538

## 539 **The Paper Explained**

### 540 **PROBLEM**

541 Paclitaxel (Taxol®) is a drug that has been proven in cancer chemotherapy. However, its  
542 administration poses problems of toxicity, undesirable side effects and resistance.

543 To overcome this problem, rather than looking for new drugs with the same mechanism of  
544 action as paclitaxel, but less toxic, we looked for drugs that work synergistically with  
545 paclitaxel to kill cancer cells, by screening a large chemical library. The underlying idea was  
546 to find a way to achieve the same therapeutic efficacy, but with lower doses of paclitaxel.

### 547 **RESULTS**

548 We describe a compound that acts synergistically with paclitaxel. This compound acts using a  
549 recently described mechanism: it modulates the dynamics of the end of the microtubules,  
550 facilitating the accumulation of paclitaxel inside the microtubule. This action at the  
551 microtubule level results in reduced tumor growth in an animal model. Thus, the same  
552 effectiveness as a therapeutic dose of paclitaxel is obtained when a lower dose of paclitaxel is  
553 used in combination with the compound.

### 554 **IMPACT**

555 The presented results pave the way for new therapeutic strategies, based on the combination  
556 of low doses of microtubule targeting agents with opposite mechanisms of action.

557 Such combinations may reduce toxicity and adverse side effects due to high doses of  
558 microtubule targeting agents used in current treatments.

559

560 **References**

- 561 1. Steinmetz MO, Prota AE (2018) Microtubule-Targeting Agents: Strategies To Hijack  
562 the Cytoskeleton. *Trends Cell Biol* 28:776-792.
- 563 2. Akhmanova A, Steinmetz MO (2015) Control of microtubule organization and  
564 dynamics: two ends in the limelight. *Nat Rev Mol Cell Biol* 16: 711–726.
- 565 3. Dumontet C, Jordan MA (2010) Microtubule-binding agents: a dynamic field of cancer  
566 therapeutics. *Nat Rev Drug Discov* 9: 790–803.
- 567 4. Jordan MA, Toso RJ, Thrower D, Wilson L (1993) Mechanism of mitotic block and  
568 inhibition of cell proliferation by taxol at low concentrations. *Proc Natl Acad Sci U S A*  
569 90: 9552–9556.
- 570 5. Walsh V, Goodman J (2002) From taxol to taxol®: The changing identities and  
571 ownership of an anti-cancer drug. *Med Anthropol* 21: 307–336.
- 572 6. Mitchison TJ (2012) The proliferation rate paradox in antimitotic chemotherapy. *Mol*  
573 *Biol Cell* 23: 1–6.
- 574 7. Zasadil LM, Andersen KA, Yeum D, Rocque GB, Wilke LG, Tevaarwerk AJ, Raines  
575 RT, Burkard ME, Weaver BA (2014) Cytotoxicity of paclitaxel in breast cancer is due  
576 to chromosome missegregation on multipolar spindles. *Sci Transl Med* 6: 229ra43.
- 577 8. Komlodi-Pasztor E, Sackett D, Wilkerson J, Fojo T (2011) Mitosis is not a key target  
578 of microtubule agents in patient tumors. *Nat Rev Clin Oncol* 8: 244–250.
- 579 9. Mitchison TJ, Pineda J, Shi J, Florian S (2017) Is inflammatory micronucleation the  
580 key to a successful anti-mitotic cancer drug? *Open Biol* 7: 170182.
- 581 10. Kavallaris M (2010) Microtubules and resistance to tubulin-binding agents. *Nat Rev*  
582 *Cancer* 10: 194–204.
- 583 11. Millicamps S, Julien J-P (2013) Axonal transport deficits and neurodegenerative  
584 diseases. *Nat Rev Neurosci* 14: 161–176.

- 585 12. Smith JA, Slusher BS, Wozniak KM, Farah MH, Smiyun G, Wilson L, Feinstein S,  
586 Jordan MA (2016) Structural Basis for Induction of Peripheral Neuropathy by  
587 Microtubule-Targeting Cancer Drugs. *Cancer Res* 76: 5115–5123.
- 588 13. Peris L, They M, Faure J, Saoudi Y, Lafanechere L, Chilton JK, Gordon-Weeks P,  
589 Galjart N, Bornens M, Wordeman L, et al. (2006) Tubulin tyrosination is a major factor  
590 affecting the recruitment of CAP-Gly proteins at microtubule plus ends. *J Cell Biol*  
591 174: 839–849.
- 592 14. Honore S, Braguer D (2011) Investigating microtubule dynamic instability using  
593 microtubule-targeting agents. *Methods Mol Biol* 777: 245–260.
- 594 15. Ramirez-Rios S, Serre L, Stoppin-Mellet V, Prezel E, Vinit A, Courriol E, Fourest-  
595 Lieuvin A, Delaroche J, Denarier E, Arnal I (2017) A TIRF microscopy assay to  
596 decode how tau regulates EB's tracking at microtubule ends. *Methods Cell Biol* 141:  
597 179–197.
- 598 16. Andreu JM (2007) Large scale purification of brain tubulin with the modified  
599 Weisenberg procedure. *Methods Mol Med* 137: 17–28.
- 600 17. Fltzgerald TJ (1976) Molecular features of colchicine associated with antimitotic  
601 activity and inhibition of tubulin polymerization. *Biochem Pharmacol* 25: 1383–1387.
- 602 18. Díaz JF, Buey RM (2007) Characterizing Ligand-Microtubule Binding by Competition  
603 Methods. In, *Methods in molecular medicine* pp 245–260.
- 604 19. Mohan R, Katrukha EA, Doodhi H, Smal I, Meijering E, Kapitein LC, Steinmetz MO,  
605 Akhmanova A (2013) End-binding proteins sensitize microtubules to the action of  
606 microtubule-targeting agents. *Proc Natl Acad Sci U S A* 110: 8900–8905.
- 607 20. Shoemaker RH (2006) The NCI60 human tumour cell line anticancer drug screen. *Nat*  
608 *Rev Cancer* 6: 813–823.
- 609 21. Maiato H, Gomes A, Sousa F, Barisic M (2017) Mechanisms of Chromosome

- 610           Congression during Mitosis. *Biology (Basel)* 6: 13.
- 611   22.   Prudent R, Moucadel V, Nguyen C-HH, Barette C, Schmidt F, Florent J-CC,  
612           Lafanechère L, Sautel CF, Duchemin-Pelletier E, Spreux E, et al. (2010) Antitumor  
613           Activity of Pyridocarbazole and Benzopyridoindole Derivatives that Inhibit Protein  
614           Kinase CK2. *Cancer Res* 70: 9865–9874.
- 615   23.   Prudent R, Vassal-Stermann E, Nguyen C-H, Pillet C, Martinez A, Prunier C, Barette  
616           C, Soleilhac E, Filhol O, Beghin A, et al. (2012) Pharmacological inhibition of LIM  
617           kinase stabilizes microtubules and inhibits neoplastic growth. *Cancer Res* 72: 4429–  
618           4439.
- 619   24.   Jordan MA, Thrower D, Wilson L (1992) Effects of vinblastine, podophyllotoxin and  
620           nocodazole on mitotic spindles. Implications for the role of microtubule dynamics in  
621           mitosis. *J Cell Sci* 102: 401–416.
- 622   25.   La Regina G, Edler MC, Brancale A, Kandil S, Coluccia A, Piscitelli F, Hamel E, De  
623           Martino G, Matesanz R, Díaz JF, et al. (2007) Arylthioindole Inhibitors of Tubulin  
624           Polymerization. 3. Biological Evaluation, Structure–Activity Relationships and  
625           Molecular Modeling Studies. *J Med Chem* 50: 2865–2874.
- 626   26.   Rai A, Liu T, Glauser S, Katrukha EA, Estévez-Gallego J, Rodríguez-García R, Fang  
627           W-S, Díaz JF, Steinmetz MO, Altmann K-H, et al. (2019) Taxanes convert regions of  
628           perturbed microtubule growth into rescue sites. *Nat Mater*.
- 629   27.   Peterson JR, Mitchison TJ (2002) Small molecules, big impact: a history of chemical  
630           inhibitors and the cytoskeleton. *Chem Biol* 9: 1275–1285.
- 631   28.   Diaz P, Horne E, Xu C, Hamel E, Wagenbach M, Petrov RR, Uhlenbruck B, Haas B,  
632           Hothi P, Wordeman L, et al. (2018) Modified carbazoles destabilize microtubules and  
633           kill glioblastoma multiform cells. *Eur J Med Chem* 159: 74–89.
- 634   29.   Kellogg EH, Hejab NMA, Howes S, Northcote P, Miller JH, Díaz JF, Downing KH,

- 635 Nogales E (2017) Insights into the Distinct Mechanisms of Action of Taxane and Non-  
636 Taxane Microtubule Stabilizers from Cryo-EM Structures. *J Mol Biol* 429: 633–646.
- 637 30. Alushin GM, Lander GC, Kellogg EH, Zhang R, Baker D, Nogales E (2014) High-  
638 resolution microtubule structures reveal the structural transitions in  $\alpha\beta$ -tubulin upon  
639 GTP hydrolysis. *Cell* 157: 1117–1129.
- 640 31. Field JJ, Pera B, Gallego JE, Calvo E, Rodríguez-Salarichs J, Sáez-Calvo G, Zuwerra  
641 D, Jordi M, Andreu JM, Prota AE, et al. (2018) Zampanolide Binding to Tubulin  
642 Indicates Cross-Talk of Taxane Site with Colchicine and Nucleotide Sites. *J Nat Prod*  
643 81:494-505.
- 644 32. Limentani SA, Brufsky AM, Erban JK, Jahanzeb M, Lewis D (2006) Phase II Study of  
645 Neoadjuvant Docetaxel/Vinorelbine Followed by Surgery and Adjuvant  
646 Doxorubicin/Cyclophosphamide in Women with Stage II/III Breast Cancer. *Clin*  
647 *Breast Cancer* 6: 511–517.
- 648 33. Tortoriello A, Facchini G, Caponigro F, Santangelo M, Benassai G, Persico G,  
649 Citarella A, Carola M, Marzano N, Iaffaioli RV (1998) Phase I/II study of paclitaxel  
650 and vinorelbine in metastatic breast cancer. *Breast Cancer Res Treat* 47: 91–97.
- 651 34. Berruti A, Bitossi R, Gorzegno G, Bottini A, Generali D, Milani M, Katsaros D,  
652 Rigault de la Longrais IA, Bellino R, Donadio M, et al. (2005) Paclitaxel, vinorelbine  
653 and 5-fluorouracil in breast cancer patients pretreated with adjuvant anthracyclines. *Br*  
654 *J Cancer* 92: 634–638.

655

656

## 657 **Figure legends**

658 **Figure 1: Selection of a compound that sensitizes cells to PTX**

659 A Schematic illustration of the concept used to screen a chemical library for compounds that  
660 sensitize cells to PTX. Treatment of cells with compounds of the library alone (5  $\mu$ M) or PTX  
661 (1 nM) alone has no effect on cell viability, compounds (5  $\mu$ M) that have no effect when  
662 applied alone but induced cell death when applied in combination with PTX (1 nM) were  
663 selected.

664 B Chemical structure of Carba1.

665 C Effect of Carba1/PTX combinations on the viability of HeLa cells. Cells were incubated for  
666 72 hours with the indicated combinations of Carba1/PTX. The percentage of viable cells was  
667 calculated following a Prestoblue assay. Data are presented as mean  $\pm$  SEM of 3 independent  
668 experiments.

669 D Effect of Carba1 (12  $\mu$ M), PTX (1 nM) and the combination of Carba1 and PTX (12  $\mu$ M/1  
670 nM) on HeLa cell apoptosis. HeLa cells, treated with the indicated concentrations of drugs,  
671 were stained with propidium iodide and annexin V and analyzed by flow cytometry. Results  
672 are expressed as mean  $\pm$  SEM of 3 separate experiments. The significance was determined by  
673 a Student's t-test (\*\*\*) $p < 0.001$ , compared to the control).

674

## 675 **Figure 2: Analysis of Carba1 toxicity**

676 A Effect of Carba1 on HeLa cell viability. Cells were incubated for 72 hours with increasing  
677 concentrations of Carba1. The percentage of viable cells was calculated following the  
678 Prestoblue assay. The results are expressed as mean  $\pm$  SEM of three separate experiments.

679 B Effect of Carba1 on HeLa cells apoptosis. HeLa cells, treated with the indicated  
680 concentrations of Carba1 for 72 hours, were stained with propidium iodide and FITC-annexin  
681 V and analyzed by flow cytometry. Apoptotic cells are observed in the upper right part of the  
682 graphs.



683 C Results for apoptotic cell death (as shown in figure 2B) are expressed as mean  $\pm$  SEM of 3  
684 separate experiments. The significance was determined by a Student's t-test (\*\*p<0.01,  
685 compared to the control).

686

687 **Figure 3: Carba1 induces a mitotic arrest**

688 A Representative images, selected from supplementary movie 1 of HeLa Kyoto cells treated  
689 with DMSO (control) and the indicated concentrations of Carba1. Bar =10  $\mu$ m.

690 B Analysis of the duration of mitosis in HeLa Kyoto cells treated with DMSO (control) or  
691 with different doses of Carba1, as indicated. Duration of prometaphase (from nuclear  
692 envelope breakdown (NEBD) to chromosome alignment; blue), metaphase (from  
693 chromosome alignment to anaphase onset; orange) and anaphase/telophase (from anaphase  
694 onset to chromosome decondensation; green) were analyzed from supplementary movie 1.  
695 The data represent 50 cells for each treatment.

696

697 **Figure 4: Comparative analysis of the effect of Carba1, PTX and of a Carba1/PTX  
698 combination on the cell cycle**

699 A HeLa cells treated with the indicated concentrations of Carba1 for 15, 24 and 48 hours,  
700 were fixed with 70% ethanol, stained with propidium iodide and analyzed by flow cytometry.

701 B HeLa cells treated with the indicated concentrations of PTX for 15, 24 and 48 hours, were  
702 fixed with 70% ethanol, stained with propidium iodide and analyzed by flow cytometry.

703 C HeLa cells treated with the combination of Carba1 and PTX (12  $\mu$ M/1 nM) for 15, 24 and  
704 48 hours, were fixed with 70% ethanol, stained with propidium iodide and analyzed by flow  
705 cytometry.

706 The results are expressed as mean  $\pm$  SEM of 3 separate experiments. The significance was  
707 determined by a Student's t-test (\*p<0.05, \*\*p<0.01, \*\*\*p<0.001, compared to the control).

708 **Figure 5: Effect of Carba1 and of the Carba1/PTX combination on MTs**

709 A Immunofluorescence analysis of the Carba1 effect on interphase and mitotic MTs. MTs in  
710 interphase (left panels) or in mitosis (right panels) were stained using an anti-tubulin antibody,  
711 as described in the methods section. DNA was stained using Hoechst reagent. Bars = 10  $\mu$ m.

712 B Time course of tubulin polymerization at 37°C in the presence of vehicle (DMSO, black  
713 line) and Carba1 at different concentrations (colored lines) as indicated, measured by  
714 turbidimetry at 350 nm. Purified tubulin: 30  $\mu$ M in BRB80 buffer with 1 mM GTP. Each  
715 turbidity value represents the mean  $\pm$  SEM from 3 independent experiments.

716 C 12% ATTO 488-labeled MTs (12  $\mu$ M free tubulin dimers) were grown from MT seeds  
717 stabilized by GMPCPP in the presence of different concentrations of Carba1 on a cover glass  
718 and then detected by TIRF microscopy. Representative kymographs for control and 4  $\mu$ M  
719 Carba1 conditions, illustrating MT plus end growth.

720 D Effect of Carba1 on the binding of [<sup>3</sup>H]-colchicine to tubulin. Carba1 (100  $\mu$ M) was used to  
721 compete with [<sup>3</sup>H]-colchicine (50 nM) as described in the methods section. Each value  
722 represents the mean  $\pm$  SEM of 3 independent experiments. Colchicine and nocodazole were  
723 used as positive and vinblastine as negative control.

724 E Displacement of MTC from the colchicine site. Fluorescence emission spectra of 10  $\mu$ M  
725 MTC and 10  $\mu$ M tubulin in 10 mM phosphate-0.1 mM GTP buffer pH 7.0, in the absence or  
726 presence of increasing concentrations of Carba1.

727 F Displacement isotherm at 25°C of the fluorescent probe MTC (10  $\mu$ M) bound to tubulin (10  
728  $\mu$ M) by Carba1 (black line and circles). The solid line is the best-fit value of the binding  
729 equilibrium constant of the competitors, assuming a one-to-one binding to the same site.

730 G, H Kymographs illustrating MT plus end growth in the presence of 15  $\mu$ M tubulin, 20 nM  
731 m-Cherry EB3 without (control) or with 5 and 10  $\mu$ M Carba1, PTX (100 nM) without or in  
732 combination with 10  $\mu$ M Carba1, Fchitax-3 (100 nM) without or with 10  $\mu$ M Carba1.

733 I Quantification of Fchitax-3 accumulation frequencies per MT unit length in the presence of  
734 15  $\mu$ M tubulin with 20 nM mCherry-EB3 without (n=11) or with 10  $\mu$ M Carba1 (n=13). Each  
735 value represents the mean  $\pm$  SD of 2 independent experiments.

736

737 **Figure 6: Effect of Carba1, PTX and their combination on tumor growth *in vivo***

738 A PTX inhibits the growth of HeLa cells xenografted in mice. When the tumors have reached  
739 a volume of about 200 mm<sup>3</sup>, mice were treated with PTX (2, 4 and 8 mg/kg) or the vehicle.  
740 Tumor growth was monitored with a sliding caliper. Error bars = SEM, \*  $p < 0.01$  compared  
741 to vehicle (ANOVA), n = 6 mice per group.

742 B Carba1 has no significant effect on the growth of HeLa cells xenografted in mice. When the  
743 tumors have reached a volume of about 200 mm<sup>3</sup>, mice were treated with Carba1 (15, 30 and  
744 60 mg/kg) or the vehicle. Tumor growth was monitored with a sliding caliper. Error bars =  
745 SEM, ns = non-significant, n = 6 mice per group.

746 C The combination of otherwise ineffective doses of Carba1 and PTX inhibits the growth of  
747 HeLa cells xenografted in mice. When the tumors have reached a volume of about 200 mm<sup>3</sup>,  
748 mice were treated with PTX (3 mg/kg), Carba1 (60 mg/kg), the vehicle or the combination of  
749 PTX (3 mg/kg) and Carba1 (60 mg/kg). Tumor growth was monitored with a sliding caliper.  
750 Error bars = SEM, \*  $p < 0.01$  compared to PTX (3 mg/kg), ¥  $p < 0.01$  compared to Carba1  
751 (60 mg/kg) (ANOVA), n = 8 mice per group.

Figure 1. Selection of a compound that sensitizes cells to PTX

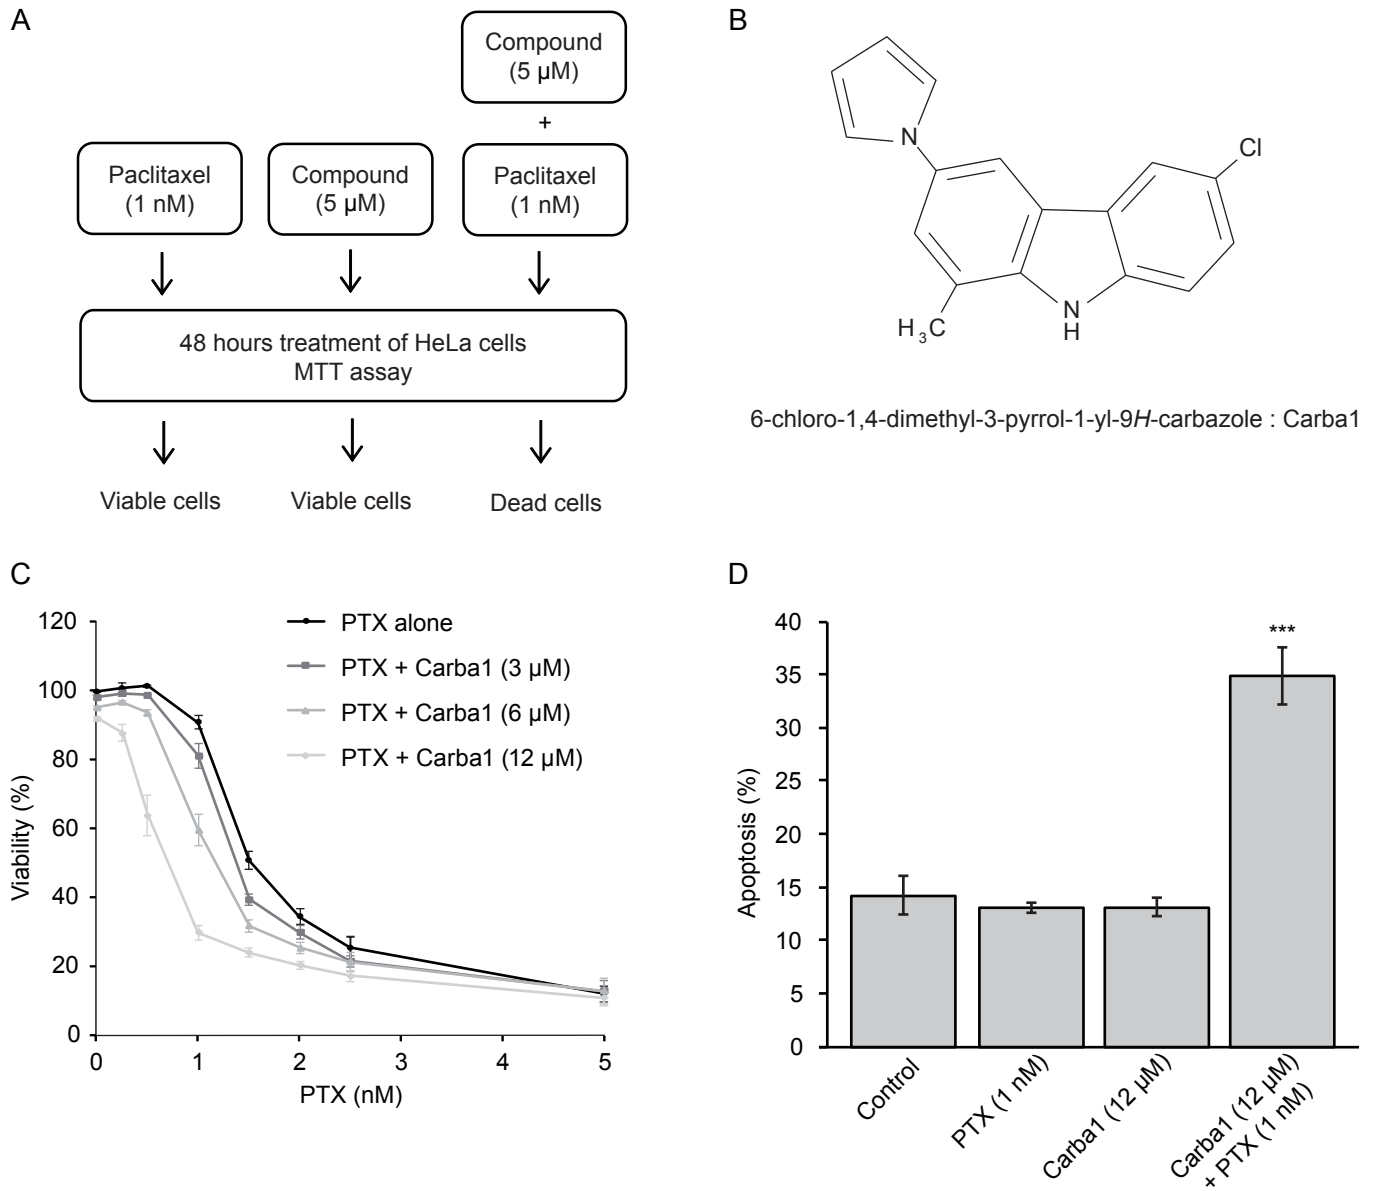

Figure 2. Analysis of Carba1 toxicity

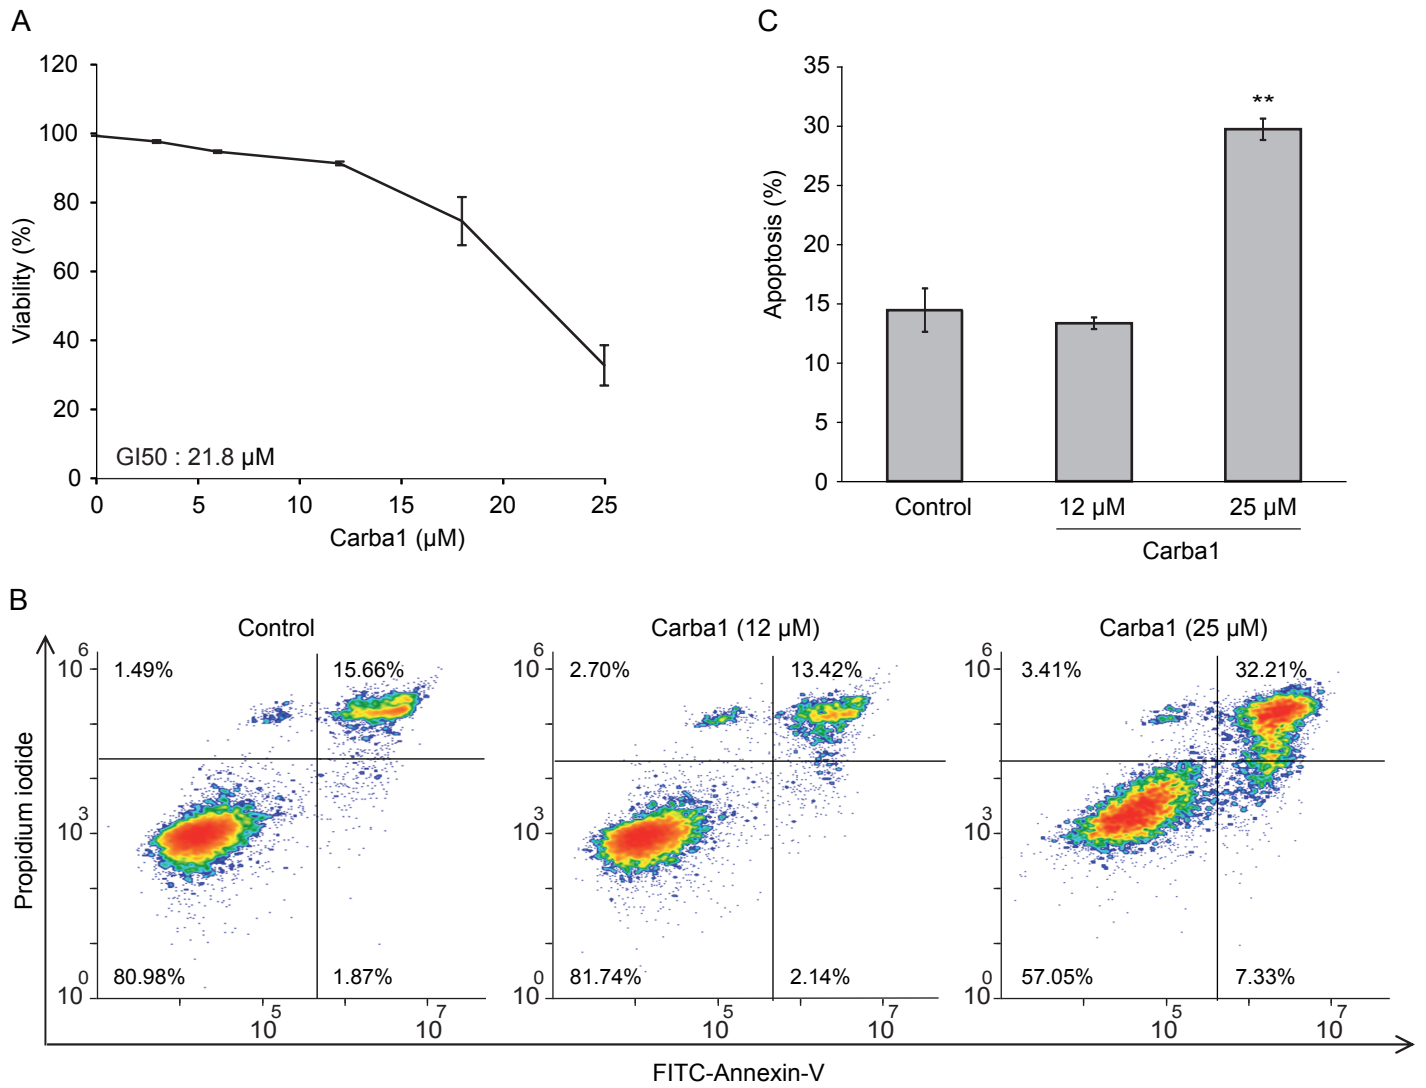

Figure 3. Carba1 induces a mitotic arrest

A

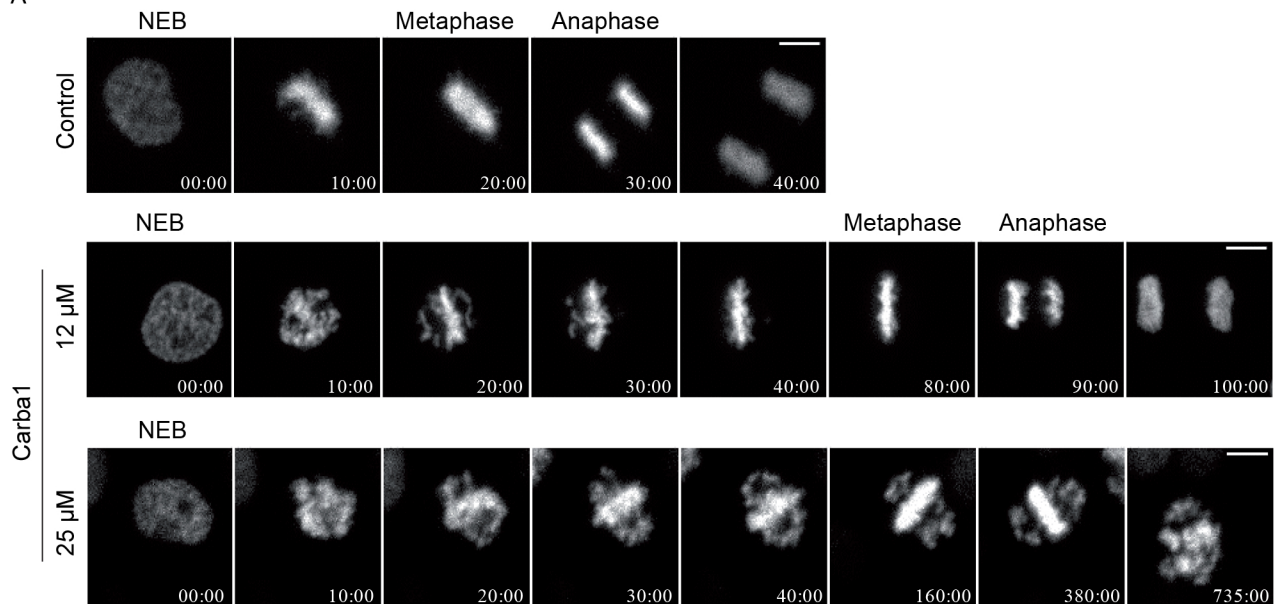

B

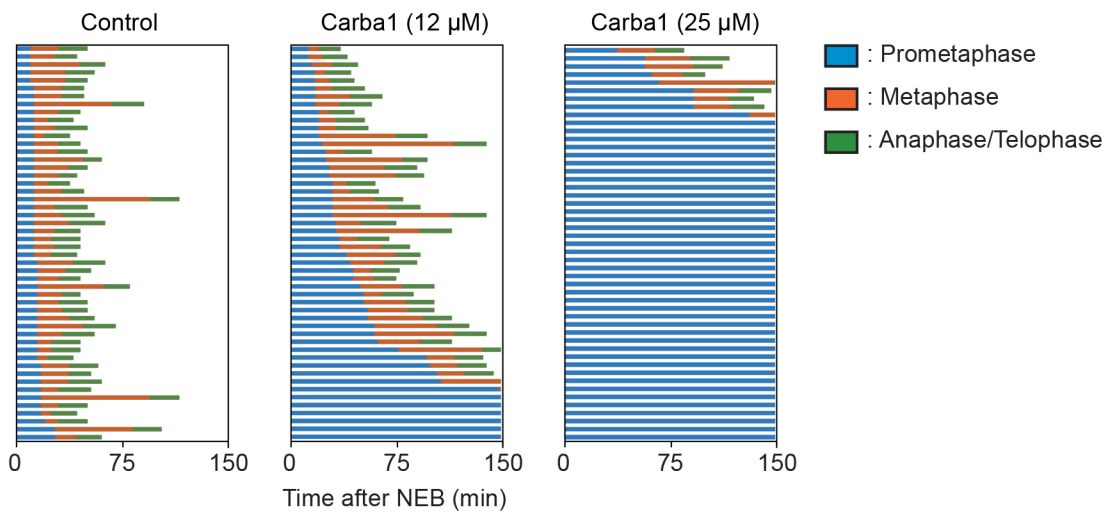

Figure 4. Comparative analysis of the effect of Carba1, PTX and a Carba1/PTX combination on the cell cycle

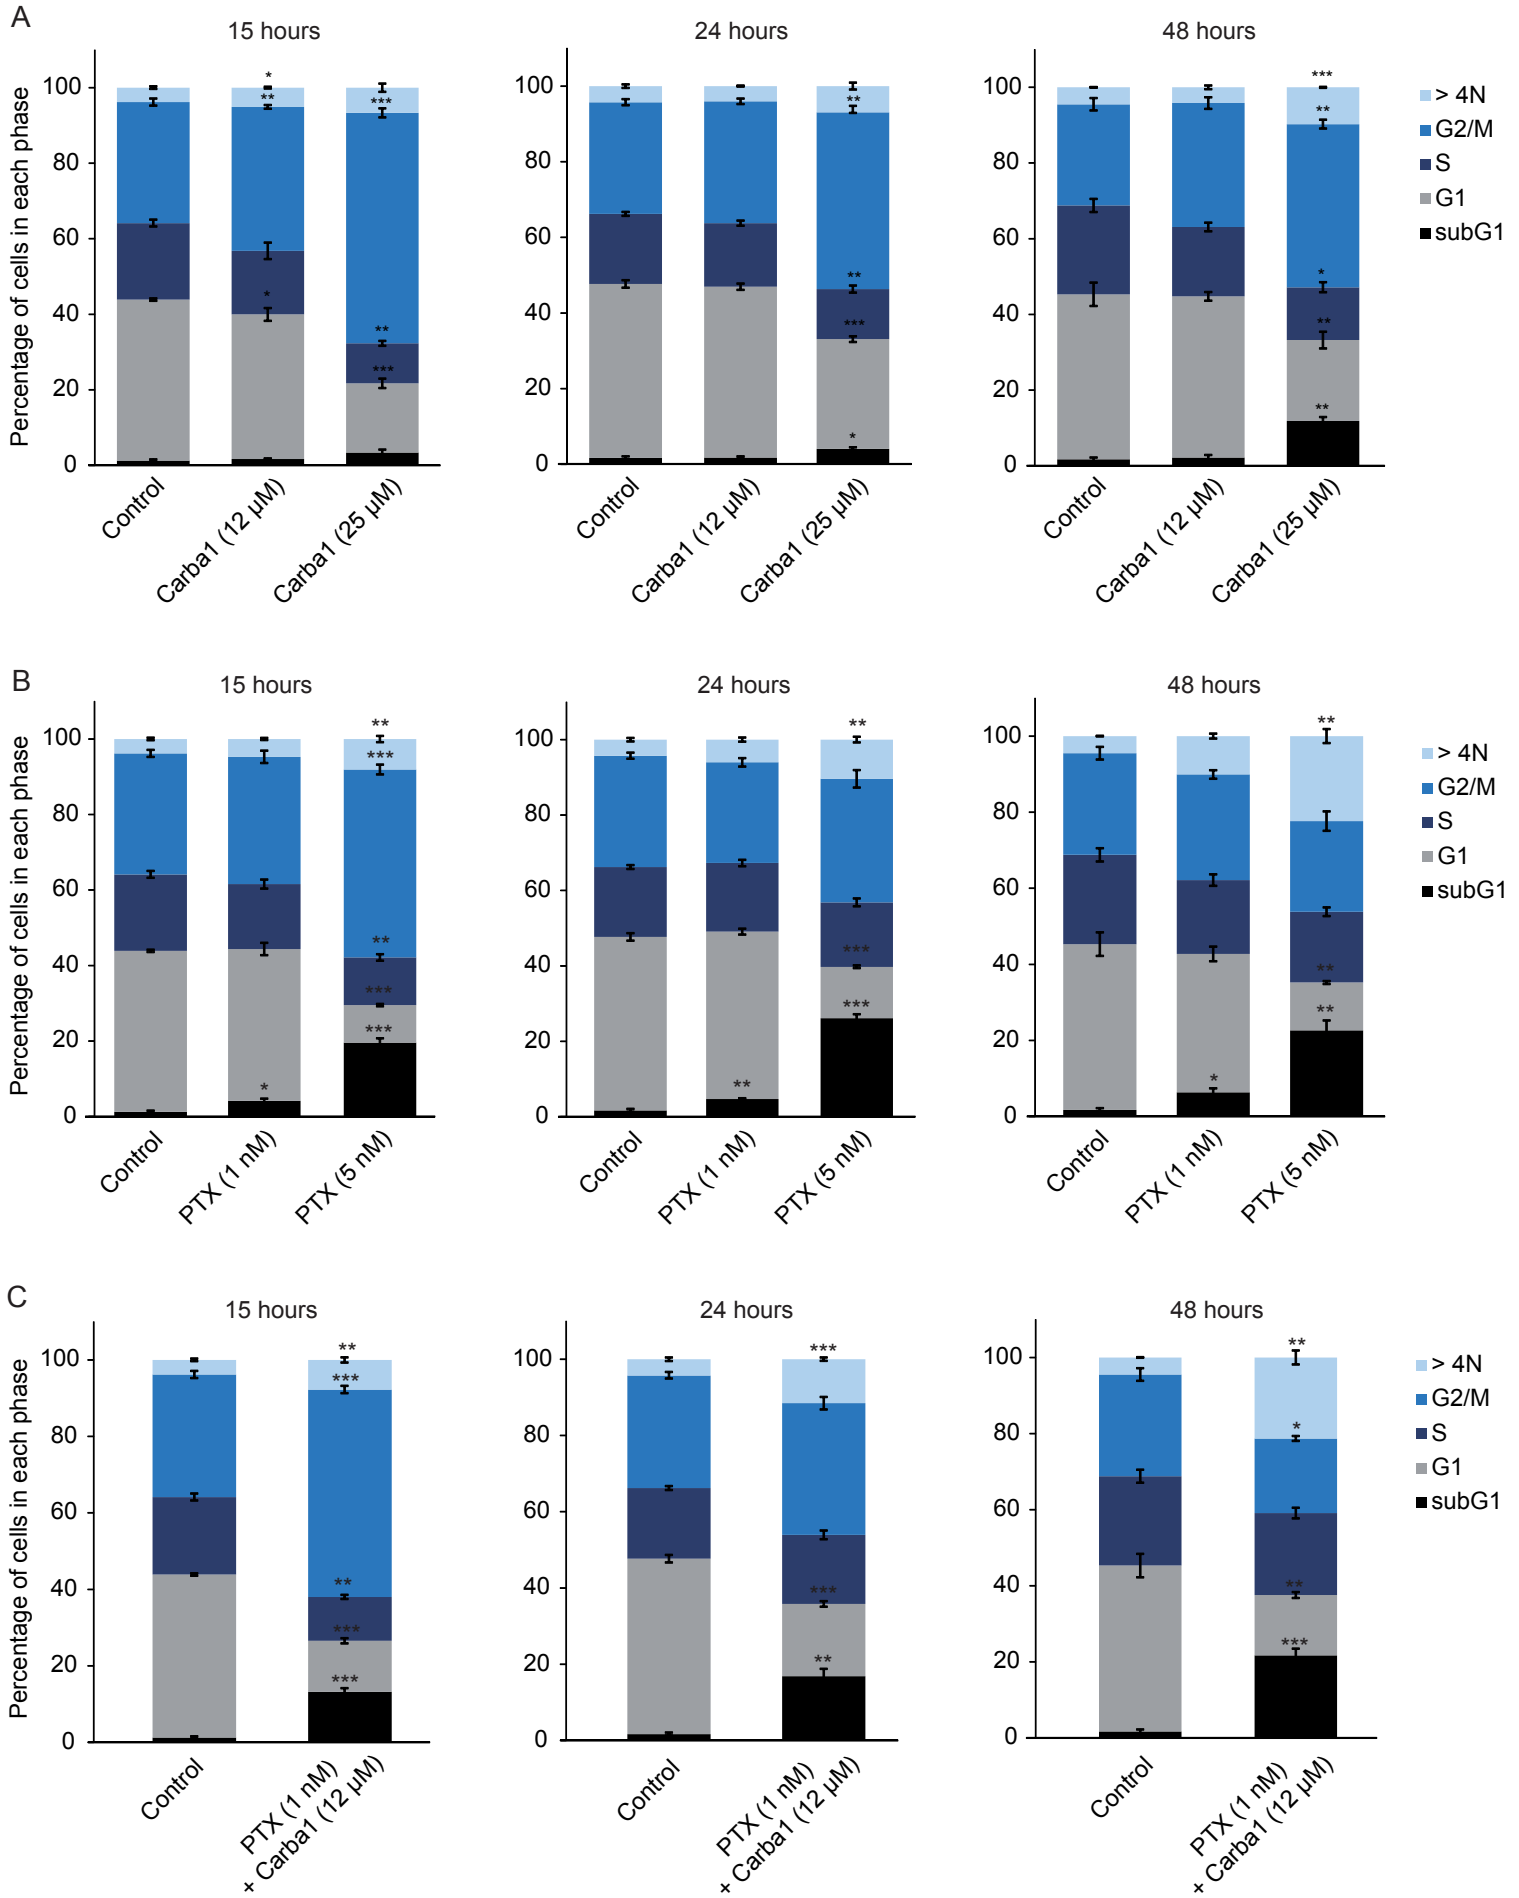



Figure 5. Effect of Carba1 and of the carba1/PTX combination on microtubules

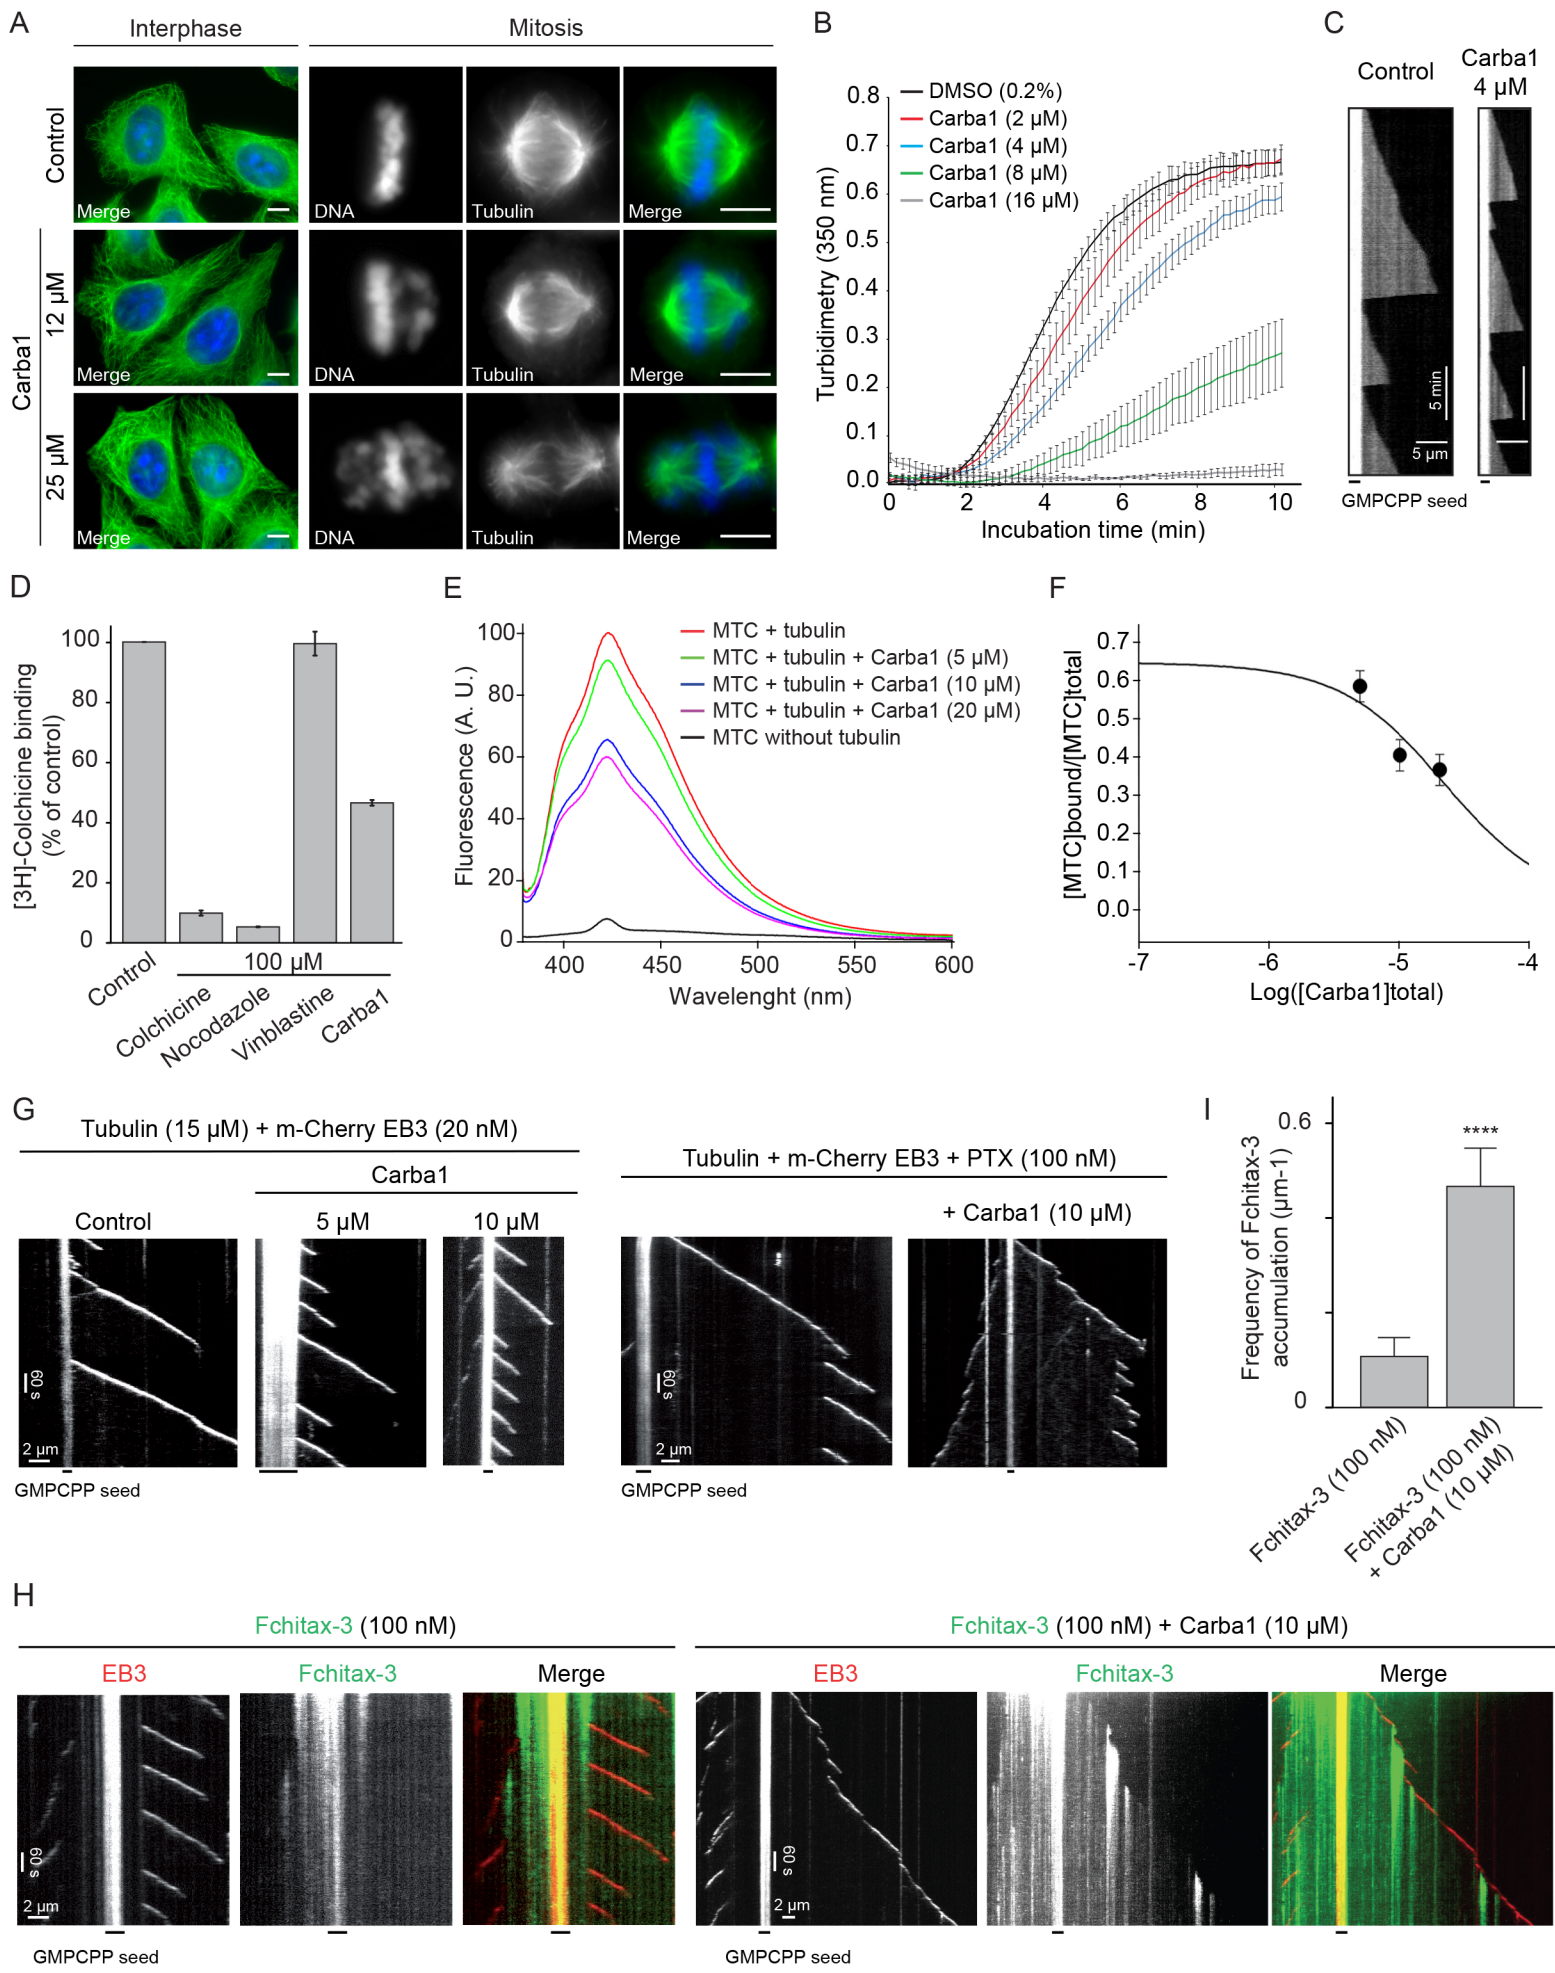



Figure 6. Effect of Carba1, PTX and their combination on tumor growth *in vivo*

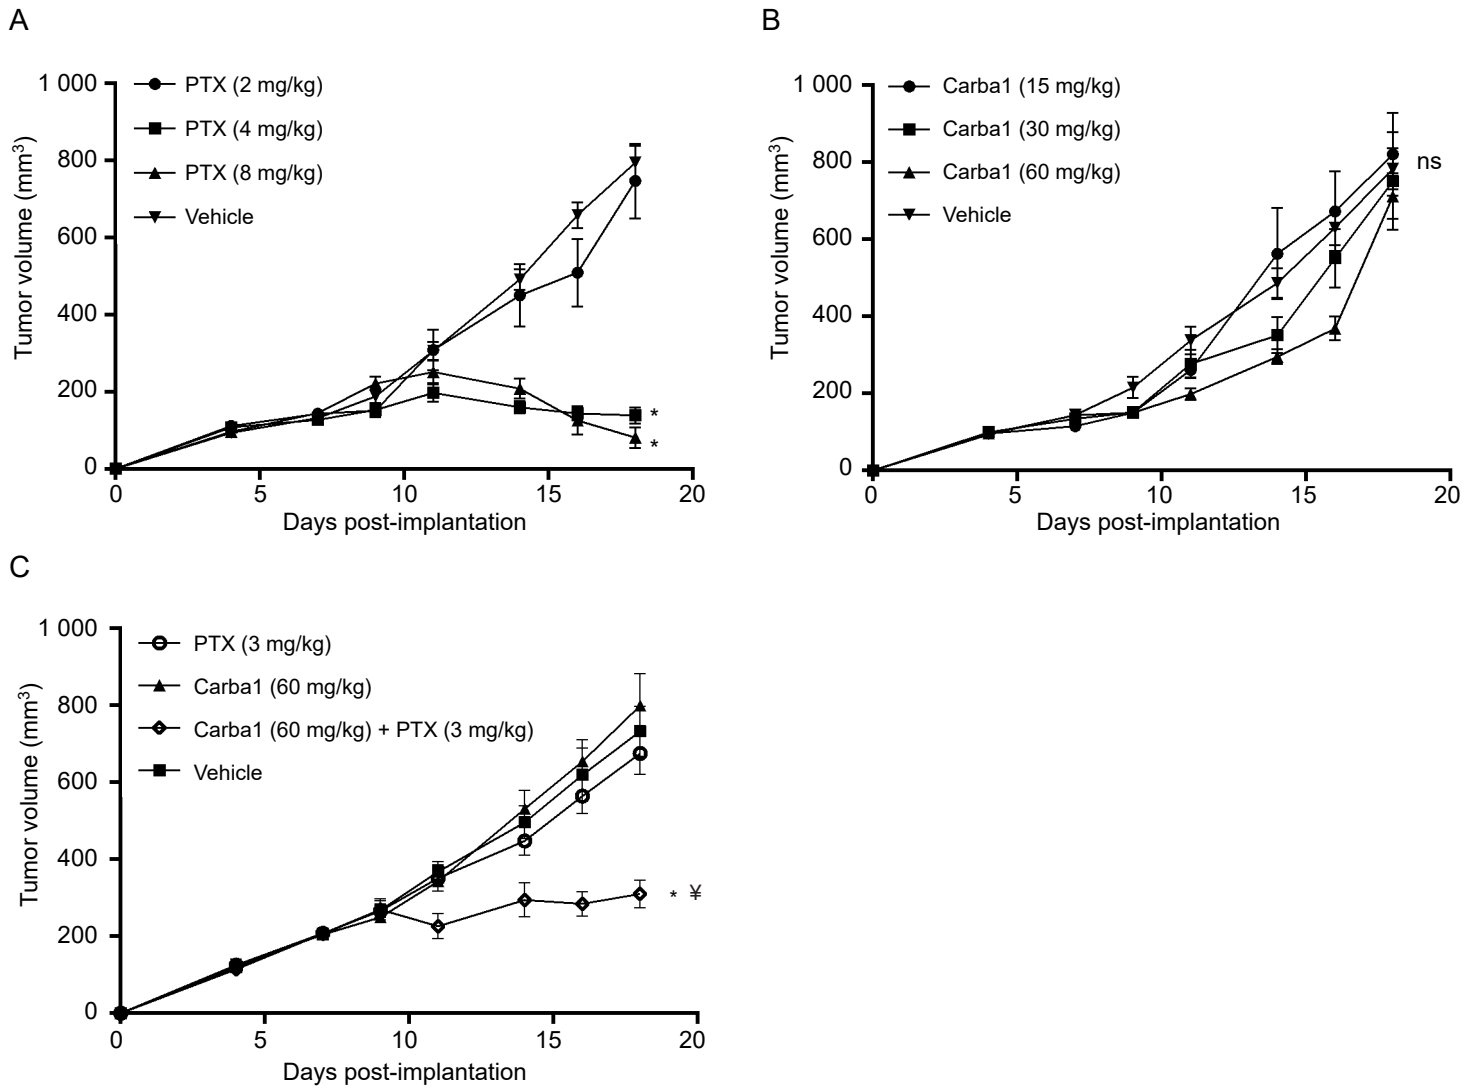

Source: https://biorxiv.org/content/biorxiv/early/2020/02/07/2020.02.06.936849.full-text.pdf
